# Supplementary material for: PFAS soil and groundwater contamination via industrial airborne emission and land deposition in SW Vermont and Eastern New York State, USA
Source: Royal Society of Chemistry journal article supplement (doi:10.1039/d0em00427h), 2021-01-01
Supplement: d0em00427h2.xlsx [file d0em00427h2.xlsx]

## Sheet: Duplicates
Supplementary Information Table ESI-2: Results of duplicate analyses
Supplemental data to accompany "PFAS soil and groundwater contamination via industrial airborne emission and land deposition in SW Vermont and Eastern New York State, USA"
Duplicate Soil Samples:
	9617080			9617081
	051618-2S- Lye #2			051618-2S- Dup
	MDL**	LOQ	Result	MDL**	LOQ	Result	Result	Result	% Diff.
PFBS	0.18	0.55	N.D.	0.19	0.58	N.D.	N.D.	N.D.
PFDA	0.18	0.55	N.D.	0.19	0.58	N.D.	N.D.	N.D.
PFDoA	0.18	0.55	N.D.	0.19	0.58	N.D.	N.D.	N.D.
PFHpA	0.18	0.55	0.45 J	0.19	0.58	0.36 J	0.45	0.36	0.222222
PFHxA	0.18	0.55	N.D.	0.19	0.58	N.D.	N.D.	N.D.
PFHxS	0.18	0.55	N.D.	0.19	0.58	N.D.	N.D.	N.D.
PFNA	0.18	0.55	0.22 J	0.19	0.58	0.24 J	0.22	0.24	0.0869565
PFOS	0.27	0.82	1.3	0.29	0.87	0.85 J	1.3	0.85	0.418605
PFOA	0.18	0.55	2.3	0.19	0.58	1.9	2.3	1.9	0.190476
PFTeDA	0.18	0.55	N.D.	0.19	0.58	N.D.	N.D.	N.D.
PFTrDA	0.18	0.55	N.D.	0.19	0.58	N.D.	N.D.	N.D.
PFUnA	0.18	0.55	N.D.	0.19	0.58	N.D.	N.D.	N.D.
TOC	2180	6540	102000	2380	7130	108000	102000	108000	0.0571429
Moisture	0.5	0.5	65.9	0.5	0.5	59.6	65.9	59.6	0.100398
Duplicate Water Samples:
	BCW-1				BCW-1-DUP
	MRL†	Result	Preparation Date	Analyzed Date	MRL†	Result	Preparation Date	Analyzed Date	% Diff
PFBS	2	< 2.0	08/10/17 07:20	08/10/17 22:13	2	< 2.0	08/10/17 07:20	08/10/17 22:30
PFDA	2	< 2.0	08/10/17 07:20	08/10/17 22:13	2	< 2.0	08/10/17 07:20	08/10/17 22:30
PFHpA	2	58	08/10/17 07:20	08/10/17 22:13	2	58	08/10/17 07:20	08/10/17 22:30	0
PFHxS	2	< 2.0	08/10/17 07:20	08/10/17 22:13	2	< 2.0	08/10/17 07:20	08/10/17 22:30
PFHxA	2	15	08/10/17 07:20	08/10/17 22:13	2	16	08/10/17 07:20	08/10/17 22:30	0.0645161
PFDoA	2	< 2.0	08/10/17 07:20	08/10/17 22:13	2	< 2.0	08/10/17 07:20	08/10/17 22:30
PFTeDA	2	< 2.0	08/10/17 07:20	08/10/17 22:13	2	< 2.0	08/10/17 07:20	08/10/17 22:30
PFNA	2	2.1	08/10/17 07:20	08/10/17 22:13	2	< 2.0	08/10/17 07:20	08/10/17 22:30
PFOS	2	< 2.0	08/10/17 07:20	08/10/17 22:13	2	< 2.0	08/10/17 07:20	08/10/17 22:30
PFOA	2	1600	08/10/17 07:20	08/11/17 10:23	2	1600	08/10/17 07:20	08/11/17 10:40	0
PFTrDA	2	< 2.0	08/10/17 07:20	08/10/17 22:13	2	< 2.0	08/10/17 07:20	08/10/17 22:30
PFUnA	2	< 2.0	08/10/17 07:20	08/10/17 22:13	2	< 2.0	08/10/17 07:20	08/10/17 22:30
	013118-1				013118-2 - DUP
	MRL†	Result	Preparation Date	Analyzed Date	MRL†	Result	Preparation Date	Analyzed Date
PFBS	2	< 2.0	02/07/18 08:16	02/09/18 00:43	2	< 2.0	02/07/18 08:16	02/09/18 00:59
PFDA	2	< 2.0	02/07/18 08:16	02/09/18 00:43	2	< 2.0	02/07/18 08:16	02/09/18 00:59
PFHpA	2	< 2.0	02/07/18 08:16	02/09/18 00:43	2	< 2.0	02/07/18 08:16	02/09/18 00:59
PFHxS	2	< 2.0	02/07/18 08:16	02/09/18 00:43	2	< 2.0	02/07/18 08:16	02/09/18 00:59
PFHxA	2	2.6	02/07/18 08:16	02/09/18 00:43	2	2.4	02/07/18 08:16	02/09/18 00:59	0.08
PFDoA	2	< 2.0	02/07/18 08:16	02/09/18 00:43	2	< 2.0	02/07/18 08:16	02/09/18 00:59
PFNA	2	< 2.0	02/07/18 08:16	02/09/18 00:43	2	< 2.0	02/07/18 08:16	02/09/18 00:59
PFOS	2	< 2.0	02/07/18 08:16	02/09/18 00:43	2	< 2.0	02/07/18 08:16	02/09/18 00:59
PFOA	2	5.4	02/07/18 08:16	02/09/18 00:43	2	6.3	02/07/18 08:16	02/09/18 00:59	0.153846
PFTrDA	2	< 2.0	02/07/18 08:16	02/09/18 00:43	2	< 2.0	02/07/18 08:16	02/09/18 00:59
PFUnA	2	< 2.0	02/07/18 08:16	02/09/18 00:43	2	< 2.0	02/07/18 08:16	02/09/18 00:59
	BCW-3 040219-3				Dup 040219-4
	MRL†	Result	Preparation Date	Analyzed Date	MRL†	Result	Units	Analyzed Date
PFBS	2	< 2.0	04/08/19 08:30	04/09/19 01:38	2	< 2.0	04/08/19 08:30	04/09/19 01:55
PFDA	2	< 2.0	04/08/19 08:30	04/09/19 01:38	2	< 2.0	04/08/19 08:30	04/09/19 01:55
PFHpA	2	25	04/08/19 08:30	04/09/19 01:38	2	25	04/08/19 08:30	04/09/19 01:55	0
PFHxS	2	< 2.0	04/08/19 08:30	04/09/19 01:38	2	< 2.0	04/08/19 08:30	04/09/19 01:55
PFHxA	2	7.7	04/08/19 08:30	04/09/19 01:38	2	7.1	04/08/19 08:30	04/09/19 01:55	0.0810811
PFDoA	2	< 2.0	04/08/19 08:30	04/09/19 01:38	2	< 2.0	04/08/19 08:30	04/09/19 01:55
PFTeDA	2	< 2.0	04/08/19 08:30	04/09/19 01:38	2	< 2.0	04/08/19 08:30	04/09/19 01:55
PFNA	2	< 2.0	04/08/19 08:30	04/09/19 01:38	2	< 2.0	04/08/19 08:30	04/09/19 01:55
PFOS	2	< 2.0	04/08/19 08:30	04/09/19 01:38	2	< 2.0	04/08/19 08:30	04/09/19 01:55
PFOA	2	580	04/08/19 08:30	04/09/19 12:04	2	630	04/08/19 08:30	04/09/19 12:21	0.0826446
PFTrDA	2	< 2.0	04/08/19 08:30	04/09/19 01:38	2	< 2.0	04/08/19 08:30	04/09/19 01:55
PFUnA	2	< 2.0	04/08/19 08:30	04/09/19 01:38	2	< 2.0	04/08/19 08:30	04/09/19 01:55
	061418-1 Fish Hatch Spring				061418-2 Dup
	MRL†	Result	Preparation Date	Analyzed Date	MRL†	Result	Units	Analyzed Date
PFBS	2	< 2.0	06/27/18 08:04	06/29/18 00:39	2	< 2.0	06/27/18 08:04	06/29/18 00:56
PFDA	2	< 2.0	06/27/18 08:04	06/29/18 00:39	2	< 2.0	06/27/18 08:04	06/29/18 00:56
PFHpA	2	< 2.0	06/27/18 08:04	06/29/18 00:39	2	< 2.0	06/27/18 08:04	06/29/18 00:56
PFHxS	2	< 2.0	06/27/18 08:04	06/29/18 00:39	2	< 2.0	06/27/18 08:04	06/29/18 00:56
PFHxA	2	< 2.0	06/27/18 08:04	06/29/18 00:39	2	< 2.0	06/27/18 08:04	06/29/18 00:56
PFDoA	2	< 2.0	06/27/18 08:04	06/29/18 00:39	2	< 2.0	06/27/18 08:04	06/29/18 00:56
PFTeDA	2	< 2.0	06/27/18 08:04	06/29/18 00:39	2	< 2.0	06/27/18 08:04	06/29/18 00:56
PFNA	2	< 2.0	06/27/18 08:04	06/29/18 00:39	2	< 2.0	06/27/18 08:04	06/29/18 00:56
PFOS	2	< 2.0	06/27/18 08:04	06/29/18 00:39	2	< 2.0	06/27/18 08:04	06/29/18 00:56
PFOA	2	< 2.0	06/27/18 08:04	06/29/18 00:39	2	< 2.0	06/27/18 08:04	06/29/18 00:56
PFTrDA	2	< 2.0	06/27/18 08:04	06/29/18 00:39	2	< 2.0	06/27/18 08:04	06/29/18 00:56
PFUnA	2	< 2.0	06/27/18 08:04	06/29/18 00:39	2	< 2.0	06/27/18 08:04	06/29/18 00:56
	050619-2 - BM-5				050619-3 - Dup of BM-5
	MRL†	Result	Preparation Date	Analyzed Date	MRL†	Result	Preparation Date	Analyzed Date	% Diff
PFBS	2	< 2.0	05/17/19 07:52	05/17/19 22:19	2	< 2.0	2019-05-17 07:52:00	2019-05-17 22:36:00
PFDA	2	< 2.0	05/17/19 07:52	05/17/19 22:19	2	< 2.0	2019-05-17 07:52:00	2019-05-17 22:36:00
PFHpA	2	2.6	05/17/19 07:52	05/17/19 22:19	2	< 2.0	2019-05-17 07:52:00	2019-05-17 22:36:00
PFHxS	2	< 2.0	05/17/19 07:52	05/17/19 22:19	2	< 2.0	2019-05-17 07:52:00	2019-05-17 22:36:00
PFHxA	2	< 2.0	05/17/19 07:52	05/17/19 22:19	2	< 2.0	2019-05-17 07:52:00	2019-05-17 22:36:00
PFDoA	2	< 2.0	05/17/19 07:52	05/17/19 22:19	2	< 2.0	2019-05-17 07:52:00	2019-05-17 22:36:00
PFTeDA	2	< 2.0	05/17/19 07:52	05/17/19 22:19	2	< 2.0	2019-05-17 07:52:00	2019-05-17 22:36:00
PFNA	2	< 2.0	05/17/19 07:52	05/17/19 22:19	2	< 2.0	2019-05-17 07:52:00	2019-05-17 22:36:00
PFOS	2	< 2.0	05/17/19 07:52	05/17/19 22:19	2	< 2.0	2019-05-17 07:52:00	2019-05-17 22:36:00
PFOA	2	35	05/17/19 07:52	05/17/19 22:19	2	17	2019-05-17 07:52:00	2019-05-17 22:36:00	0.692308
PFTrDA	2	< 2.0	05/17/19 07:52	05/17/19 22:19	2	< 2.0	2019-05-17 07:52:00	2019-05-17 22:36:00
PFUnA	2	< 2.0	05/17/19 07:52	05/17/19 22:19	2	< 2.0	2019-05-17 07:52:00	2019-05-17 22:36:00
