# Supplementary material for: PFAS soil and groundwater contamination via industrial airborne emission and land deposition in SW Vermont and Eastern New York State, USA
Source: Royal Society of Chemistry journal article supplement (doi:10.1039/d0em00427h), 2021-01-01
Supplement: d0em00427h4.xlsx [file d0em00427h4.xlsx]

## Sheet: Table_for_paper
Supplementary Information Table ESI-4: Soil Sample Analytical Results Summary
Supplemental data to accompany "PFAS soil and groundwater contamination via industrial airborne emission and land deposition in SW Vermont and Eastern New York State, USA"	Supplemental data to accompany "PFAS soil and groundwater contamination via industrial airborne emission and land deposition in SW Vermont and Eastern New York State, USA"	Supplemental data to accompany "PFAS soil and groundwater contamination via industrial airborne emission and land deposition in SW Vermont and Eastern New York State, USA"	Supplemental data to accompany "PFAS soil and groundwater contamination via industrial airborne emission and land deposition in SW Vermont and Eastern New York State, USA"	Supplemental data to accompany "PFAS soil and groundwater contamination via industrial airborne emission and land deposition in SW Vermont and Eastern New York State, USA"	Supplemental data to accompany "PFAS soil and groundwater contamination via industrial airborne emission and land deposition in SW Vermont and Eastern New York State, USA"	Supplemental data to accompany "PFAS soil and groundwater contamination via industrial airborne emission and land deposition in SW Vermont and Eastern New York State, USA"	Supplemental data to accompany "PFAS soil and groundwater contamination via industrial airborne emission and land deposition in SW Vermont and Eastern New York State, USA"	Supplemental data to accompany "PFAS soil and groundwater contamination via industrial airborne emission and land deposition in SW Vermont and Eastern New York State, USA"	Supplemental data to accompany "PFAS soil and groundwater contamination via industrial airborne emission and land deposition in SW Vermont and Eastern New York State, USA"	Supplemental data to accompany "PFAS soil and groundwater contamination via industrial airborne emission and land deposition in SW Vermont and Eastern New York State, USA"	Supplemental data to accompany "PFAS soil and groundwater contamination via industrial airborne emission and land deposition in SW Vermont and Eastern New York State, USA"	Supplemental data to accompany "PFAS soil and groundwater contamination via industrial airborne emission and land deposition in SW Vermont and Eastern New York State, USA"	Supplemental data to accompany "PFAS soil and groundwater contamination via industrial airborne emission and land deposition in SW Vermont and Eastern New York State, USA"	Supplemental data to accompany "PFAS soil and groundwater contamination via industrial airborne emission and land deposition in SW Vermont and Eastern New York State, USA"	Supplemental data to accompany "PFAS soil and groundwater contamination via industrial airborne emission and land deposition in SW Vermont and Eastern New York State, USA"	Supplemental data to accompany "PFAS soil and groundwater contamination via industrial airborne emission and land deposition in SW Vermont and Eastern New York State, USA"	Supplemental data to accompany "PFAS soil and groundwater contamination via industrial airborne emission and land deposition in SW Vermont and Eastern New York State, USA"	Supplemental data to accompany "PFAS soil and groundwater contamination via industrial airborne emission and land deposition in SW Vermont and Eastern New York State, USA"	Supplemental data to accompany "PFAS soil and groundwater contamination via industrial airborne emission and land deposition in SW Vermont and Eastern New York State, USA"	Supplemental data to accompany "PFAS soil and groundwater contamination via industrial airborne emission and land deposition in SW Vermont and Eastern New York State, USA"	Supplemental data to accompany "PFAS soil and groundwater contamination via industrial airborne emission and land deposition in SW Vermont and Eastern New York State, USA"	Supplemental data to accompany "PFAS soil and groundwater contamination via industrial airborne emission and land deposition in SW Vermont and Eastern New York State, USA"	Supplemental data to accompany "PFAS soil and groundwater contamination via industrial airborne emission and land deposition in SW Vermont and Eastern New York State, USA"	Supplemental data to accompany "PFAS soil and groundwater contamination via industrial airborne emission and land deposition in SW Vermont and Eastern New York State, USA"	Supplemental data to accompany "PFAS soil and groundwater contamination via industrial airborne emission and land deposition in SW Vermont and Eastern New York State, USA"	Supplemental data to accompany "PFAS soil and groundwater contamination via industrial airborne emission and land deposition in SW Vermont and Eastern New York State, USA"	Supplemental data to accompany "PFAS soil and groundwater contamination via industrial airborne emission and land deposition in SW Vermont and Eastern New York State, USA"	Supplemental data to accompany "PFAS soil and groundwater contamination via industrial airborne emission and land deposition in SW Vermont and Eastern New York State, USA"	Supplemental data to accompany "PFAS soil and groundwater contamination via industrial airborne emission and land deposition in SW Vermont and Eastern New York State, USA"	Supplemental data to accompany "PFAS soil and groundwater contamination via industrial airborne emission and land deposition in SW Vermont and Eastern New York State, USA"	Supplemental data to accompany "PFAS soil and groundwater contamination via industrial airborne emission and land deposition in SW Vermont and Eastern New York State, USA"	Supplemental data to accompany "PFAS soil and groundwater contamination via industrial airborne emission and land deposition in SW Vermont and Eastern New York State, USA"	Supplemental data to accompany "PFAS soil and groundwater contamination via industrial airborne emission and land deposition in SW Vermont and Eastern New York State, USA"	Supplemental data to accompany "PFAS soil and groundwater contamination via industrial airborne emission and land deposition in SW Vermont and Eastern New York State, USA"	Supplemental data to accompany "PFAS soil and groundwater contamination via industrial airborne emission and land deposition in SW Vermont and Eastern New York State, USA"	Supplemental data to accompany "PFAS soil and groundwater contamination via industrial airborne emission and land deposition in SW Vermont and Eastern New York State, USA"	Supplemental data to accompany "PFAS soil and groundwater contamination via industrial airborne emission and land deposition in SW Vermont and Eastern New York State, USA"	Supplemental data to accompany "PFAS soil and groundwater contamination via industrial airborne emission and land deposition in SW Vermont and Eastern New York State, USA"	Supplemental data to accompany "PFAS soil and groundwater contamination via industrial airborne emission and land deposition in SW Vermont and Eastern New York State, USA"	Supplemental data to accompany "PFAS soil and groundwater contamination via industrial airborne emission and land deposition in SW Vermont and Eastern New York State, USA"	Supplemental data to accompany "PFAS soil and groundwater contamination via industrial airborne emission and land deposition in SW Vermont and Eastern New York State, USA"	Supplemental data to accompany "PFAS soil and groundwater contamination via industrial airborne emission and land deposition in SW Vermont and Eastern New York State, USA"	Supplemental data to accompany "PFAS soil and groundwater contamination via industrial airborne emission and land deposition in SW Vermont and Eastern New York State, USA"	Supplemental data to accompany "PFAS soil and groundwater contamination via industrial airborne emission and land deposition in SW Vermont and Eastern New York State, USA"	Supplemental data to accompany "PFAS soil and groundwater contamination via industrial airborne emission and land deposition in SW Vermont and Eastern New York State, USA"	Supplemental data to accompany "PFAS soil and groundwater contamination via industrial airborne emission and land deposition in SW Vermont and Eastern New York State, USA"	Supplemental data to accompany "PFAS soil and groundwater contamination via industrial airborne emission and land deposition in SW Vermont and Eastern New York State, USA"	Supplemental data to accompany "PFAS soil and groundwater contamination via industrial airborne emission and land deposition in SW Vermont and Eastern New York State, USA"	Supplemental data to accompany "PFAS soil and groundwater contamination via industrial airborne emission and land deposition in SW Vermont and Eastern New York State, USA"
Sample locations dived into four sampling regions discussed in text
All concentrations in ug/kg
Sample location coordinates in WGS-84 UTM Zone 18 North (EPSG: 32618)
Downwind of Chemfab
Sample #	Sample name	Easting	Northing	PFOA (ug/kg)	PFOS (ug/kg)	PFHpA (ug/kg)	PFHxA (ug/kg)	PFNA (ug/kg)	PFDA (ug/kg)	PFDoA(ug/kg)	PFUnA(ug/kg)	TOC (g/kg)
051218-1S	Bald Mountain East #1	651666	4753625	5.3	1.4	0.45*	N.D. / <0.20	0.38*	0.32*	0.25*	0.26*	85
051218-2S	Bald Mountain East #2	652168	4753146	3.2	0.32*	0.19*	N.D. / <0.19	N.D. / <0.19	N.D. / <0.19	N.D. / <0.19	N.D. / <0.19	24.6
051218-3S	Bald Mountain East #3	652213	4753238	3.1	N.D. / <0.28	0.21*	N.D. / <0.19	N.D. / <0.19	N.D. / <0.19	N.D. / <0.19	N.D. / <0.19	49
051218-4S	Bald Mountain East #4	652828	4752540	3.6	0.5*	0.37*	0.2*	N.D. / <0.19	N.D. / <0.19	N.D. / <0.19	N.D. / <0.19	31.9
051218-5S	Bald Mountain East #5	652940	4752676	6.3	0.48*	0.39*	0.23*	N.D. / <0.19	N.D. / <0.19	N.D. / <0.19	N.D. / <0.19	28.4
01-052818-BM1	BaldMtnWest#1	649567	4750710	3.8	0.46*	0.39*	0.43*	0.2*	N.D. / <0.19	N.D. / <0.19	N.D. / <0.19	21.7
01-052818-BM2	BaldMtnWest#2	649655	4751071	1.4	0.41*	N.D. / <0.20	N.D. / <0.20	N.D. / <0.20	N.D. / <0.20	N.D. / <0.20	N.D. / <0.20	65.1
01-052818-BM3	BaldMtnWest#3	649844	4751752	8.7	0.86	0.49*	0.32*	N.D. / <0.19	N.D. / <0.19	N.D. / <0.19	N.D. / <0.19	58.9
01-052818-BM4	BaldMtnWest#4	649886	4752786	23	0.69*	0.73*	0.25*	N.D. / <0.19	N.D. / <0.19	N.D. / <0.19	N.D. / <0.19	82.9
01-052818-BM5	BaldMtnWest#5	650039	4751757	4	0.62*	0.24*	0.2*	N.D. / <0.20	N.D. / <0.20	N.D. / <0.20	N.D. / <0.20	88.8
7-20-17-1S	BaldMtnWest-2017#1	649307	4750384	3.3	N.D. / <0.29	0.27*	0.26*	0.16*	N.D. / <0.19	N.D. / <0.19	N.D. / <0.19	N/A
7-20-17-2S	BaldMtnWest-2017#2	649826	4751193	5.8	0.46*	0.44*	0.24*	0.17*	N.D. / <0.19	N.D. / <0.19	N.D. / <0.19	N/A
7-20-17-3S	BaldMtnWest-2017#3	650314	4752322	5.4	0.35*	0.41*	0.22*	0.12*	N.D. / <0.20	N.D. / <0.20	N.D. / <0.20	N/A
7-20-17-4S	BaldMtnWest-2017#4	650504	4752550	0.75	0.34*	N.D. / <0.19	N.D. / <0.19	0.18*	N.D. / <0.19	N.D. / <0.19	N.D. / <0.19	N/A
7-20-17-5S	BaldMtnWest-2017#5	651460	4753661	N.D. / <0.19	N.D. / <0.29	N.D. / <0.19	N.D. / <0.097	N.D. / <0.097	N.D. / <0.19	N.D. / <0.19	N.D. / <0.19	N/A
061218-Soil 1	Maple Hill	655693	4751352	3.8	N.D. / <0.35	N.D. / <0.35	N.D. / <0.35	N.D. / <0.35	N.D. / <0.35	N.D. / <0.35	N.D. / <0.35	62.3
061218-Soil 2	Melville	655241	4749849	9.6	0.87*	0.63*	0.38*	N.D. / <0.28	N.D. / <0.28	N.D. / <0.28	N.D. / <0.28	46.6
061318-Soil 5	Little Pond #1	658013	4751810	3.8	0.74*	0.32*	N.D. / <0.29	N.D. / <0.29	N.D. / <0.29	N.D. / <0.29	N.D. / <0.29	53.7
061318-Soil 4	Aiken #1	661668	4749124	1.9	0.47*	N.D. / <0.31	N.D. / <0.31	N.D. / <0.31	N.D. / <0.31	N.D. / <0.31	N.D. / <0.31	59.7
042719-2S BM-2S	Bald Mtn West - Sp19-1	649891	4752790	98	3.3*	4.3	1.4*	N.D. / <0.98	N.D. / <0.98	N.D. / <0.98	N.D. / <0.98	322
042719-3S BM-3S	Bald Mtn West - Sp19-2	650094	4753475	8.5	1.6*	N.D. / <0.92	N.D. / <0.92	N.D. / <0.92	N.D. / <0.92	N.D. / <0.92	N.D. / <0.92	245
			Mean	10.1625	0.472222	0.325294	0.151667	<0.19				53.7615
			Median	3.9	0.46	0.37	0.2	<0.19				53.7
North of main Wind Pattern
Sample #	Sample name	Easting	Northing	PFOA (ug/kg)	PFOS (ug/kg)	PFHpA (ug/kg)	PFHxA (ug/kg)	PFNA (ug/kg)	PFDA (ug/kg)	PFDoA(ug/kg)	PFUnA(ug/kg)	TOC (g/kg)
051518-1S	Kelly #1	657512	4768640	0.91	0.34*	N.D. / <0.19	N.D. / <0.19	N.D. / <0.19	N.D. / <0.19	N.D. / <0.19	N.D. / <0.19	24.2
051518-2S	Kelly #2	657563	4768275	1	0.34*	N.D. / <0.19	N.D. / <0.19	N.D. / <0.19	N.D. / <0.19	N.D. / <0.19	N.D. / <0.19	26.3
061318-Soil 1	Kelley #3	657995	4766246	1.3	0.49*	N.D. / <0.28	N.D. / <0.28	N.D. / <0.28	N.D. / <0.28	N.D. / <0.28	N.D. / <0.28	39.1
061318-Soil 2	Kelley #4	658346	4767378	2.1	0.71*	N.D. / <0.35	N.D. / <0.35	N.D. / <0.35	N.D. / <0.35	N.D. / <0.35	N.D. / <0.35	66.3
061318-Soil 3	Kelley #5	663995	4770962	1.5	0.67*	N.D. / <0.31	N.D. / <0.31	N.D. / <0.31	N.D. / <0.31	N.D. / <0.31	N.D. / <0.31	60.4
051618-1S	Lye #1	659589	4777043	1.1	0.55*	0.22*	N.D. / <0.19	N.D. / <0.19	N.D. / <0.19	N.D. / <0.19	N.D. / <0.19	68.2
051618-2S	Lye #2	659720	4778674	2.3	1.3*	0.45*	N.D. / <0.18	0.22*	N.D. / <0.18	N.D. / <0.18	N.D. / <0.18	102
051618-2Sdup	Lye #2 dup	659720	4778674	1.9	0.85*	0.36*	N.D. / <0.19	0.24*	N.D. / <0.19	N.D. / <0.19	N.D. / <0.19	108
061918-1	Smokey #1	657723	4798880	0.55*	N.D. / <0.23	N.D. / <0.23	N.D. / <0.23	N.D. / <0.23	N.D. / <0.23	N.D. / <0.23	N.D. / <0.23	16.7
061918-2	Smokey #2	657701	4798167	0.53*	N.D. / <0.25	N.D. / <0.25	N.D. / <0.25	N.D. / <0.25	N.D. / <0.25	N.D. / <0.25	N.D. / <0.25	23.6
061918-3	Smokey #3	657977	4797840	0.81	0.42*	N.D. / <0.26	N.D. / <0.26	N.D. / <0.26	N.D. / <0.26	N.D. / <0.26	N.D. / <0.26	21
061918-4	Smokey #4	658020	4798590	0.81	0.58*	N.D. / <0.23	N.D. / <0.23	N.D. / <0.23	N.D. / <0.23	N.D. / <0.23	N.D. / <0.23	22.1
061918-5	Grif #1	664932	4797653	1.4	0.82*	N.D. / <0.31	N.D. / <0.31	0.39*	N.D. / <0.31	N.D. / <0.31	N.D. / <0.31	61
061918-6	Grif #2	665496	4798130	0.89*	0.72*	N.D. / <0.34	N.D. / <0.34	N.D. / <0.34	N.D. / <0.34	N.D. / <0.34	N.D. / <0.34	95
061918-7	Grif #3	664041	4797427	1.9	1.0*	0.31*	N.D. / <0.30	0.3*	N.D. / <0.30	N.D. / <0.30	N.D. / <0.30	73.3
061918-8	Grif #4	663683	4796606	1.4	1.2	0.26*	N.D. / <0.25	0.45*	N.D. / <0.25	N.D. / <0.25	N.D. / <0.25	43.3
062118-1	Merk #1	646746	4790685	1.6	1.1*	N.D. / <0.29	N.D. / <0.29	0.3*	N.D. / <0.29	N.D. / <0.29	N.D. / <0.29	89.4
062118-2	Merk #2	647141	4790752	1.9	1.0*	0.33*	0.28*	0.37*	N.D. / <0.28	N.D. / <0.28	N.D. / <0.28	74.8
062118-3	Merk #3	648072	4792175	1.3	0.82*	N.D. / <0.24	N.D. / <0.24	0.29*	N.D. / <0.24	N.D. / <0.24	N.D. / <0.24	26.6
			Mean	1.32632	0.679474	<0.19	<0.19	<0.19				54.8053
			Median	1.3	0.71	<0.19	<0.19	<0.19				60.4
Local - Upwind
Sample #	Sample name	Easting	Northing	PFOA (ug/kg)	PFOS (ug/kg)	PFHpA (ug/kg)	PFHxA (ug/kg)	PFNA (ug/kg)	PFDA (ug/kg)	PFDoA(ug/kg)	PFUnA(ug/kg)	TOC (g/kg)
082218-1	Pitt1	625569	4742036	1.1	0.37*	N.D. / <0.24	N.D. / <0.24	N.D. / <0.24	N.D. / <0.24	N.D. / <0.24	N.D. / <0.24	18.5
082218-2	Pitt2	625708	4742019	1	0.52*	N.D. / <0.23	N.D. / <0.23	N.D. / <0.23	N.D. / <0.23	N.D. / <0.23	N.D. / <0.23	32.2
082218-3	Pitt3	626187	4742247	1.8	0.76*	N.D. / <0.25	N.D. / <0.25	0.29*	N.D. / <0.25	N.D. / <0.25	N.D. / <0.25	38.3
082218-4	Pitt4	626058	4742798	0.74	N.D. / <0.24	N.D. / <0.24	N.D. / <0.24	N.D. / <0.24	N.D. / <0.24	N.D. / <0.24	N.D. / <0.24	20.6
			Mean	1.16	0.4125	<0.23	<0.23	<0.23				27.4
			Median	1.05	0.445	<0.23	<0.23	<0.23				26.4
Far Afield
Sample #	Sample name	Easting	Northing	PFOA (ug/kg)	PFOS (ug/kg)	PFHpA (ug/kg)	PFHxA (ug/kg)	PFNA (ug/kg)	PFDA (ug/kg)	PFDoA(ug/kg)	PFUnA(ug/kg)	TOC (g/kg)
081918-CSM1	Cat1	573318	4683422	0.57*	0.95*	N.D. / <0.27	N.D. / <0.27	0.37*	N.D. / <0.27	N.D. / <0.27	N.D. / <0.26	65.7
081918-CSM2	Cat2	574253	4682988	0.96	0.66*	0.3*	0.32*	0.36*	N.D. / <0.26	N.D. / <0.26	N.D. / <0.26	66.5
081918-CSM3	Cat3	574073	4681044	0.97	0.86*	0.31*	0.29*	0.42*	N.D. / <0.26	N.D. / <0.26	N.D. / <0.26	33.4
082518-1	ADK1	602548	4896653	0.5*	N.D. / <0.26	N.D. / <0.26	N.D. / <0.26	N.D. / <0.26	N.D. / <0.26	N.D. / <0.26	N.D. / <0.26	50
082518-1	ADK2	602080	4897205	0.26*	N.D. / <0.22	N.D. / <0.22	N.D. / <0.22	N.D. / <0.22	N.D. / <0.22	N.D. / <0.22	N.D. / <0.22	35.5
082518-1	ADK3	602841	4898861	1.1	1.4*	0.41*	N.D. / <0.34	0.45*	N.D. / <0.34	N.D. / <0.34	0.34	144
052618-1S	SmugNotch#1	676414	4935728	0.35*	0.35*	N.D. / <0.20	N.D. / <0.20	N.D. / <0.20	N.D. / <0.20	N.D. / <0.20	N.D. / <0.20	57.7
052718-1S	SmugNotch#2	676633	4931865	0.23*	N.D. / <0.19	N.D. / <0.19	N.D. / <0.19	N.D. / <0.19	N.D. / <0.19	N.D. / <0.19	N.D. / <0.19	32.8
			Mean	0.6175	0.5275	<0.19	<0.19	0.2				60.7
			Median	0.535	0.505	<0.19	<0.19	0.18				53.85
Average for All "Background" Sites				PFOA (ug/kg)	PFOS (ug/kg)	PFHpA (ug/kg)	PFHxA (ug/kg)	PFNA (ug/kg)				TOC (g/kg)
			Mean	1.12194	0.605806	0.0951613	0.0287097	0.143548				52.7903
			Median	1	0.66	0	0	0				43.3
* Value below minimum quantification limit, estimated value
Bennington Local
Sample #	Sample name	Easting	Northing	PFOA (ug/kg)	PFOS (ug/kg)	PFHpA (ug/kg)	PFHxA (ug/kg)	PFNA (ug/kg)	PFDA (ug/kg)	PFDoA(ug/kg)	PFUnA(ug/kg)	TOC (g/kg)
BCW-1 0-0.5	BCW-1 0-0.5	643704	4753750	7.1	12	0.25*	0.2*	0.31	0.25*	0.18	0.25*	31
BCW-2 0-0.5	BCW-1 0-0.5	643707	4753711	17	1.3	0.78	0.48	0.35	0.35	0.22*	0.28*	54
BCW-3 0-0.5	BCW-1 0-0.5	643343	4753131	2.6	0.21*	0.29	0.34	0.32	0.42	0.22*	0.26	13
BCW-4 0-0.5	BCW-1 0-0.5	643830	4752911	6.5	0.31	0.21*	0.4	0.62	0.51	0.25	0.25	22
BCW-5 0-1.5	BCW-5 0-1.5	644142	4753469	3.4	N.D. / <0.20	N.D. / <0.20	N.D. / <0.20	N.D. / <0.20	N.D. / <0.20	N.D. / <0.20	N.D. / <0.20	16.5
BCW-6 0-1.5	BCW-6 0-1.5	644052	4753663	3.8	0.31*	0.27*	N.D. / <0.20	N.D. / <0.20	N.D. / <0.20	N.D. / <0.20	N.D. / <0.20	18.3
BCW-7 0-1.5	BCW-7 0-1.5	643689	4753785	4	0.37*	0.27*	N.D. / <0.20	N.D. / <0.20	N.D. / <0.20	N.D. / <0.20	N.D. / <0.20	13.9
BCW-8 0-1.5	BCW-8 0-1.5	643430	4753523	3.5	N.D. / <0.27	N.D. / <0.18	N.D. / <0.18	N.D. / <0.18	N.D. / <0.18	N.D. / <0.18	N.D. / <0.18	18.1
7-21-17-1S	Honeysuckle-lane	644521	4753676	2.4	0.42*	N.D. / <0.20	N.D. / <0.20	0.17*	N.D. / <0.20	N.D. / <0.20	N.D. / <0.20
7-21-17-2S	Matteson Rd	644813	4753972	2.3	N.D. / <0.28	0.32*	0.16*	0.15*	N.D. / <0.19	N.D. / <0.19	N.D. / <0.19
7-21-17-3S	Rice Lane	645245	4753113	6.7	N.D. / <0.29	0.23*	0.13*	0.16*	N.D. / <0.19	N.D. / <0.19	N.D. / <0.19
7-24-17-1S	Rt. 7a	646189	4752348	1.7	N.D. / <0.27	N.D. / <0.18	0.15*	N.D. / <0.091	N.D. / <0.18	N.D. / <0.18	N.D. / <0.18
7-24-17-2S	Chapel Rd.	648608	4751518	0.63	N.D. / <0.30	0.41*	N.D. / <0.099	N.D. / <0.099	N.D. / <0.20	N.D. / <0.20	N.D. / <0.20
052119-1 WH-1	Whip 1	642101	4750425	4.9	0.67*	0.45*	0.33*	0.36*	0.34*	N.D. / <0.26	0.27*	14.9
052119-2 WH-2	Whip 2	641844	4750452	16	0.49*	0.67*	N.D. / <0.26	N.D. / <0.26	N.D. / <0.26	N.D. / <0.26	N.D. / <0.26	28.8
			Mean	5.502
			Median	3.8
[truncated: 5,000 more columns]

## Sheet: All_as_numbers
Supplementary Information Table ESI-1 - Soil Sample Analytical Results Summary
Sample locations dived into four sampling regions discussed in text
All concentrations in ug/kg
Sample location coordinates in WGS-84 UTM Zone 18 North (EPSG: 32618)
Downwind of Bennington/Hoosick
Sample #	Sample name	Easting	Northing	PFOA (ug/kg)	PFOS (ug/kg)	PFHpA (ug/kg)	PFHxA (ug/kg)	PFNA (ug/kg)	PFDA (ug/kg)	PFDoA(ug/kg)	PFUnA(ug/kg)	TOC (g/kg)	PFOA:TOC(ug/kg)	PFOS:TOC(ug/kg)	PFOA:PFNA	Sum PFAS (ug/kg)
051218-1S	Bald Mountain East #1	651666	4753625	5.3	1.4	0.45		0.38	0.32	0.25	0.26	85	62.3529	16.4706	13.9474	8.36
051218-2S	Bald Mountain East #2	652168	4753146	3.2	0.32	0.19						24.6	130.081	13.0081		3.71
051218-3S	Bald Mountain East #3	652213	4753238	3.1		0.21						49	63.2653	0		3.31
051218-4S	Bald Mountain East #4	652828	4752540	3.6	0.5	0.37	0.2					31.9	112.853	15.674		4.67
051218-5S	Bald Mountain East #5	652940	4752676	6.3	0.48	0.39	0.23					28.4	221.831	16.9014		7.4
01-052818-BM1	BaldMtnWest#1	649567	4750710	3.8	0.46	0.39	0.43	0.2				21.7	175.115	21.1982	19	5.28
01-052818-BM2	BaldMtnWest#2	649655	4751071	1.4	0.41							65.1	21.5054	6.298		1.81
01-052818-BM3	BaldMtnWest#3	649844	4751752	8.7	0.86	0.49	0.32					58.9	147.708	14.601		10.37
01-052818-BM4	BaldMtnWest#4	649886	4752786	23*	0.69*	0.73*	0.25*					82.9
01-052818-BM5	BaldMtnWest#5	650039	4751757	4	0.62	0.24	0.2					88.8	45.045	6.98198		5.06
7-20-17-1S	BaldMtnWest-2017#1	649307	4750384	3.3		0.27	0.26	0.16							20.625	3.99
7-20-17-2S	BaldMtnWest-2017#2	649826	4751193	5.8	0.46	0.44	0.24	0.17							34.1176	7.11
7-20-17-3S	BaldMtnWest-2017#3	650314	4752322	5.4	0.35	0.41	0.22	0.12							45	6.5
7-20-17-4S	BaldMtnWest-2017#4	650504	4752550	0.75	0.34			0.18							4.16667	1.27
7-20-17-5S	BaldMtnWest-2017#5	651460	4753661	0												0
061218-Soil 1	Maple Hill	655693	4751352	3.8								62.3	60.9952	0		3.8
061218-Soil 2	Melville	655241	4749849	9.6	0.87	0.63	0.38					46.6	206.009	18.6695		11.48
061318-Soil 5	Little Pond #1	658013	4751810	3.8	0.74	0.32						53.7	70.7635	13.7803		4.86
061318-Soil 4	Aiken #1	661668	4749124	1.9	0.47							59.7	31.8258	7.8727		2.37
042719-2S BM-2S	Bald Mtn West - Sp19-1	649891	4752790	98*	3.3*	4.3*	1.4*					322
042719-3S BM-3S	Bald Mtn West - Sp19-2	650094	4753475	8.5	1.6							245	34.6939	6.53061		10.1
			Mean	4.32895	0.658667	0.369231	0.275556	0.201667	0.32	0.25	0.26	82.85	98.8603	11.2847	22.8094	5.33947
			Median	3.8	0.48	0.39	0.24	0.175	0.32	0.25	0.26	59.3	67.0144	13.3942	19.8125	4.86
North of main Wind Pattern
Sample #	Sample name	Easting	Northing	PFOA (ug/kg)	PFOS (ug/kg)	PFHpA (ug/kg)	PFHxA (ug/kg)	PFNA (ug/kg)	PFDA (ug/kg)	PFDoA(ug/kg)	PFUnA(ug/kg)	TOC (g/kg)	PFOA:TOC(ug/kg)	PFOS:TOC(ug/kg)	PFOA:PFNA	Sum PFAS (ug/kg)
051518-1S	Kelly #1	657512	4768640	0.91	0.34							24.2	37.6033	14.0496		1.25
051518-2S	Kelly #2	657563	4768275	1	0.34							26.3	38.0228	12.9278		1.34
061318-Soil 1	Kelley #3	657995	4766246	1.3	0.49							39.1	33.2481	12.532		1.79
061318-Soil 2	Kelley #4	658346	4767378	2.1	0.71							66.3	31.6742	10.7089		2.81
061318-Soil 3	Kelley #5	663995	4770962	1.5	0.67							60.4	24.8344	11.0927		2.17
051618-1S	Lye #1	659589	4777043	1.1	0.55	0.22						68.2	16.129	8.06452		1.87
051618-2S	Lye #2	659720	4778674	2.3	1.3	0.45		0.22				102	22.549	12.7451	10.4545	4.27
051618-2Sdup	Lye #2 dup	659720	4778674	1.9	0.85	0.36		0.24				108	17.5926	7.87037	7.91667	3.35
061918-1	Smokey #1	657723	4798880	0.55								16.7	32.9341	0		0.55
061918-2	Smokey #2	657701	4798167	0.53								23.6	22.4576	0		0.53
061918-3	Smokey #3	657977	4797840	0.81	0.42							21	38.5714	20		1.23
061918-4	Smokey #4	658020	4798590	0.81	0.58							22.1	36.6516	26.2443		1.39
061918-5	Grif #1	664932	4797653	1.4	0.82			0.39				61	22.9508	13.4426	3.58974	2.61
061918-6	Grif #2	665496	4798130	0.89	0.72							95	9.36842	7.57895		1.61
061918-7	Grif #3	664041	4797427	1.9	1	0.31		0.3				73.3	25.9209	13.6426	6.33333	3.51
061918-8	Grif #4	663683	4796606	1.4	1.2	0.26		0.45				43.3	32.3326	27.7136	3.11111	3.31
062118-1	Merk #1	646746	4790685	1.6	1.1			0.3				89.4	17.8971	12.3043	5.33333	3
062118-2	Merk #2	647141	4790752	1.9	1	0.33	0.28	0.37				74.8	25.4011	13.369	5.13514	3.88
062118-3	Merk #3	648072	4792175	1.3	0.82			0.29				26.6	48.8722	30.8271	4.48276	2.41
			Mean	1.32632	0.759412	0.321667	0.28	0.32				54.8053	28.1585	13.427	5.79458	2.25684
			Median	1.3	0.72	0.32	0.28	0.3				60.4	25.9209	12.7451	5.23423	2.17
Local - Upwind
Sample #	Sample name	Easting	Northing	PFOA (ug/kg)	PFOS (ug/kg)	PFHpA (ug/kg)	PFHxA (ug/kg)	PFNA (ug/kg)	PFDA (ug/kg)	PFDoA(ug/kg)	PFUnA(ug/kg)	TOC (g/kg)	PFOA:TOC(ug/kg)	PFOS:TOC(ug/kg)	PFOA:PFNA	Sum PFAS (ug/kg)
082218-1	Pitt1	625569	4742036	1.1	0.37							18.5	59.4595	20		1.47
082218-2	Pitt2	625708	4742019	1	0.52							32.2	31.0559	16.1491		1.52
082218-3	Pitt3	626187	4742247	1.8	0.76			0.29				38.3	46.9974	19.8433	6.2069	2.85
082218-4	Pitt4	626058	4742798	0.74								20.6	35.9223	0		0.74
			Mean	1.16	0.55	<0.23	<0.23	<0.23				27.4	43.3588	13.9981	6.2069	1.645
			Median	1.05	0.52	<0.23	<0.23	<0.23				26.4	41.4599	17.9962	6.2069	1.495
Far Afield
Sample #	Sample name	Easting	Northing	PFOA (ug/kg)	PFOS (ug/kg)	PFHpA (ug/kg)	PFHxA (ug/kg)	PFNA (ug/kg)	PFDA (ug/kg)	PFDoA(ug/kg)	PFUnA(ug/kg)	TOC (g/kg)	PFOA:TOC(ug/kg)	PFOS:TOC(ug/kg)	PFOA:PFNA	Sum PFAS (ug/kg)
081918-CSM1	Cat1	573318	4683422	0.57	0.95			0.37				65.7	8.6758	14.4597	1.54054	1.89
081918-CSM2	Cat2	574253	4682988	0.96	0.66	0.3	0.32	0.36				66.5	14.4361	9.92481	2.66667	2.6
081918-CSM3	Cat3	574073	4681044	0.97	0.86	0.31	0.29	0.42				33.4	29.0419	25.7485	2.30952	2.85
082518-1	ADK1	602548	4896653	0.5								50	10	0		0.5
082518-1	ADK2	602080	4897205	0.26								35.5	7.32394	0		0.26
082518-1	ADK3	602841	4898861	1.1	1.4	0.41		0.45			0.34	144	7.63889	9.72222	2.44444	3.7
052618-1S	SmugNotch#1	676414	4935728	0.35	0.35							57.7	6.06586	6.06586		0.7
052718-1S	SmugNotch#2	676633	4931865	0.23								32.8	7.0122	0		0.23
			Mean	0.6175	0.844	0.34	0.305	0.4				60.7	60.7	60.7	2.24029	60.7
			Median	0.535	0.86	0.31	0.305	0.395				53.85	53.85	53.85	2.37698	53.85
Average for All "Background" Sites				PFOA (ug/kg)	PFOS (ug/kg)	PFHpA (ug/kg)	PFHxA (ug/kg)	PFNA (ug/kg)				TOC (g/kg)
			Mean	1.12194	0.605806	0.0951613	0.0287097	0.143548				52.7903
			Median	1	0.66	0	0	0				43.3
* Value below minimum quantification limit, estimated value
Bennington Local
Sample #	Sample name	Easting	Northing	PFOA (ug/kg)	PFOS (ug/kg)	PFHpA (ug/kg)	PFHxA (ug/kg)	PFNA (ug/kg)	PFDA (ug/kg)	PFDoA(ug/kg)	PFUnA(ug/kg)	TOC (g/kg)	PFOA:TOC(ug/kg)	PFOS:TOC(ug/kg)	PFOA:PFNA	Sum PFAS (ug/kg)
BCW-1 0-0.5	BCW-1 0-0.5	643704	4753750	7.1	12	0.25	0.2	0.31	0.25		0.25	31	229.032	387.097	22.9032	20.36
BCW-2 0-0.5	BCW-1 0-0.5	643707	4753711	17	1.3	0.78	0.48	0.35	0.35	0.22	0.28	54	314.815	24.0741	48.5714	20.76
BCW-3 0-0.5	BCW-1 0-0.5	643343	4753131	2.6	0.21	0.29	0.34	0.32	0.42	0.22	0.26	13	200	16.1538	8.125	4.66
BCW-4 0-0.5	BCW-1 0-0.5	643830	4752911	6.5	0.31	0.21	0.4	0.62	0.51	0.25	0.25	22	295.455	14.0909	10.4839	9.05
BCW-5 0-1.5	BCW-5 0-1.5	644142	4753469	3.4								16.5	206.061	0		3.4
BCW-6 0-1.5	BCW-6 0-1.5	644052	4753663	3.8	0.31	0.27						18.3	207.65	16.9399		4.38
BCW-7 0-1.5	BCW-7 0-1.5	643689	4753785	4	0.37	0.27						13.9	287.77	26.6187		4.64
BCW-8 0-1.5	BCW-8 0-1.5	643430	4753523	3.5								18.1	193.37	0		3.5
7-21-17-1S	Honeysuckle-lane	644521	4753676	2.4	0.42			0.17							14.1176	2.99
7-21-17-2S	Matteson Rd	644813	4753972	2.3		0.32	0.16	0.15							15.3333	2.93
7-21-17-3S	Rice Lane	645245	4753113	6.7		0.23	0.13	0.16							41.875	7.22
7-24-17-1S	Rt. 7a	646189	4752348	1.7			0.15									1.85
7-24-17-2S	Chapel Rd.	648608	4751518	0.63		0.41										1.04
052119-1 WH-1	Whip 1	642101	4750425	4.9	0.67	0.45	0.33	0.36	0.34		0.27	14.9	328.859	44.9664	13.6111	7.32
052119-2 WH-2	Whip 2	641844	4750452	16	0.49	0.67						28.8	555.556	17.0139		17.16
			Mean	5.502	1.78667	0.377273	0.27375	0.305	0.374	0.23	0.262	23.05	281.857	54.6955	21.8776	7.41733
			Median	3.8	0.42	0.29	0.265	0.315	0.35	0.22	0.26	18.2	258.401	16.9769	14.7255	4.64

## Sheet: for_csv
Region	Sample #	Sample name	Easting	Northing	PFOA (ug/kg)	PFOS (ug/kg)	PFHpA (ug/kg)	PFHxA (ug/kg)	PFNA (ug/kg)	PFDA (ug/kg)	PFDoA(ug/kg)	PFUnA(ug/kg)	TOC (g/kg)	PFOA:TOC(ug/kg)	PFOS:TOC(ug/kg)	Sum PFAS (ug/kg)
Downwind of Bennington	051218-1S	Bald Mountain East #1	651666	4753625	5.3	1.4	0.45		0.38	0.32	0.25	0.26	85	62.3529	16.4706	8.36
Downwind of Bennington	051218-2S	Bald Mountain East #2	652168	4753146	3.2	0.32	0.19						24.6	130.081	13.0081	3.71
Downwind of Bennington	051218-3S	Bald Mountain East #3	652213	4753238	3.1		0.21						49	63.2653	0	3.31
Downwind of Bennington	051218-4S	Bald Mountain East #4	652828	4752540	3.6	0.5	0.37	0.2					31.9	112.853	15.674	4.67
Downwind of Bennington	051218-5S	Bald Mountain East #5	652940	4752676	6.3	0.48	0.39	0.23					28.4	221.831	16.9014	7.4
Downwind of Bennington	01-052818-BM1	BaldMtnWest#1	649567	4750710	3.8	0.46	0.39	0.43	0.2				21.7	175.115	21.1982	5.28
Downwind of Bennington	01-052818-BM2	BaldMtnWest#2	649655	4751071	1.4	0.41							65.1	21.5054	6.298	1.81
Downwind of Bennington	01-052818-BM3	BaldMtnWest#3	649844	4751752	8.7	0.86	0.49	0.32					58.9	147.708	14.601	10.37
Downwind of Bennington	01-052818-BM4	BaldMtnWest#4	649886	4752786	23	0.69	0.73	0.25					82.9	277.443	8.32328	24.67
Downwind of Bennington	01-052818-BM5	BaldMtnWest#5	650039	4751757	4	0.62	0.24	0.2					88.8	45.045	6.98198	5.06
Downwind of Bennington	7-20-17-1S	BaldMtnWest-2017#1	649307	4750384	3.3		0.27	0.26	0.16							3.99
Downwind of Bennington	7-20-17-2S	BaldMtnWest-2017#2	649826	4751193	5.8	0.46	0.44	0.24	0.17							7.11
Downwind of Bennington	7-20-17-3S	BaldMtnWest-2017#3	650314	4752322	5.4	0.35	0.41	0.22	0.12							6.5
Downwind of Bennington	7-20-17-4S	BaldMtnWest-2017#4	650504	4752550	0.75	0.34			0.18							1.27
Downwind of Bennington	7-20-17-5S	BaldMtnWest-2017#5	651460	4753661	0											0
Downwind of Bennington	061218-Soil 1	Maple Hill	655693	4751352	3.8								62.3	60.9952	0	3.8
Downwind of Bennington	061218-Soil 2	Melville	655241	4749849	9.6	0.87	0.63	0.38					46.6	206.009	18.6695	11.48
Downwind of Bennington	061318-Soil 5	Little Pond #1	658013	4751810	3.8	0.74	0.32						53.7	70.7635	13.7803	4.86
Downwind of Bennington	061318-Soil 4	Aiken #1	661668	4749124	1.9	0.47							59.7	31.8258	7.8727	2.37
Downwind of Bennington	042719-2S BM-2S	Bald Mtn West - Sp19-1	649891	4752790	98	3.3	4.3	1.4					322	304.348	10.2484	107
Downwind of Bennington	042719-3S BM-3S	Bald Mtn West - Sp19-2	650094	4753475	8.5	1.6							245	34.6939	6.53061	10.1
North of main Wind Pattern	051518-1S	Kelly #1	657512	4768640	0.91	0.34							24.2	37.6033	14.0496	1.25
North of main Wind Pattern	051518-2S	Kelly #2	657563	4768275	1	0.34							26.3	38.0228	12.9278	1.34
North of main Wind Pattern	061318-Soil 1	Kelley #3	657995	4766246	1.3	0.49							39.1	33.2481	12.532	1.79
North of main Wind Pattern	061318-Soil 2	Kelley #4	658346	4767378	2.1	0.71							66.3	31.6742	10.7089	2.81
North of main Wind Pattern	061318-Soil 3	Kelley #5	663995	4770962	1.5	0.67							60.4	24.8344	11.0927	2.17
North of main Wind Pattern	051618-1S	Lye #1	659589	4777043	1.1	0.55	0.22						68.2	16.129	8.06452	1.87
North of main Wind Pattern	051618-2S	Lye #2	659720	4778674	2.3	1.3	0.45		0.22				102	22.549	12.7451	4.27
North of main Wind Pattern	051618-2Sdup	Lye #2 dup	659720	4778674	1.9	0.85	0.36		0.24				108	17.5926	7.87037	3.35
North of main Wind Pattern	061918-1	Smokey #1	657723	4798880	0.55								16.7	32.9341	0	0.55
North of main Wind Pattern	061918-2	Smokey #2	657701	4798167	0.53								23.6	22.4576	0	0.53
North of main Wind Pattern	061918-3	Smokey #3	657977	4797840	0.81	0.42							21	38.5714	20	1.23
North of main Wind Pattern	061918-4	Smokey #4	658020	4798590	0.81	0.58							22.1	36.6516	26.2443	1.39
North of main Wind Pattern	061918-5	Grif #1	664932	4797653	1.4	0.82			0.39				61	22.9508	13.4426	2.61
North of main Wind Pattern	061918-6	Grif #2	665496	4798130	0.89	0.72							95	9.36842	7.57895	1.61
North of main Wind Pattern	061918-7	Grif #3	664041	4797427	1.9	1	0.31		0.3				73.3	25.9209	13.6426	3.51
North of main Wind Pattern	061918-8	Grif #4	663683	4796606	1.4	1.2	0.26		0.45				43.3	32.3326	27.7136	3.31
North of main Wind Pattern	062118-1	Merk #1	646746	4790685	1.6	1.1			0.3				89.4	17.8971	12.3043	3
North of main Wind Pattern	062118-2	Merk #2	647141	4790752	1.9	1	0.33	0.28	0.37				74.8	25.4011	13.369	3.88
North of main Wind Pattern	062118-3	Merk #3	648072	4792175	1.3	0.82			0.29				26.6	48.8722	30.8271	2.41
Local - Upwind	082218-1	Pitt1	625569	4742036	1.1	0.37							18.5	59.4595	20	1.47
Local - Upwind	082218-2	Pitt2	625708	4742019	1	0.52							32.2	31.0559	16.1491	1.52
Local - Upwind	082218-3	Pitt3	626187	4742247	1.8	0.76			0.29				38.3	46.9974	19.8433	2.85
Local - Upwind	082218-4	Pitt4	626058	4742798	0.74								20.6	35.9223	0	0.74
Far Afield	081918-CSM1	Cat1	573318	4683422	0.57	0.95			0.37				65.7	8.6758	14.4597	1.89
Far Afield	081918-CSM2	Cat2	574253	4682988	0.96	0.66	0.3	0.32	0.36				66.5	14.4361	9.92481	2.6
Far Afield	081918-CSM3	Cat3	574073	4681044	0.97	0.86	0.31	0.29	0.42				33.4	29.0419	25.7485	2.85
Far Afield	082518-1	ADK1	602548	4896653	0.5								50	10	0	0.5
Far Afield	082518-1	ADK2	602080	4897205	0.26								35.5	7.32394	0	0.26
Far Afield	082518-1	ADK3	602841	4898861	1.1	1.4	0.41		0.45			0.34	144	7.63889	9.72222	3.7
Far Afield	052618-1S	SmugNotch#1	676414	4935728	0.35	0.35							57.7	6.06586	6.06586	0.7
Far Afield	052718-1S	SmugNotch#2	676633	4931865	0.23								32.8	7.0122	0	0.23
Bennington Local	BCW-1 0-0.5	BCW-1 0-0.5	643704	4753750	7.1	12	0.25	0.2	0.31	0.25		0.25	31	229.032	387.097	20.36
Bennington Local	BCW-2 0-0.5	BCW-1 0-0.5	643707	4753711	17	1.3	0.78	0.48	0.35	0.35	0.22	0.28	54	314.815	24.0741	20.76
Bennington Local	BCW-3 0-0.5	BCW-1 0-0.5	643343	4753131	2.6	0.21	0.29	0.34	0.32	0.42	0.22	0.26	13	200	16.1538	4.66
Bennington Local	BCW-4 0-0.5	BCW-1 0-0.5	643830	4752911	6.5	0.31	0.21	0.4	0.62	0.51	0.25	0.25	22	295.455	14.0909	9.05
Bennington Local	BCW-5 0-1.5	BCW-5 0-1.5	644142	4753469	3.4								16.5	206.061	0	3.4
Bennington Local	BCW-6 0-1.5	BCW-6 0-1.5	644052	4753663	3.8	0.31	0.27						18.3	207.65	16.9399	4.38
Bennington Local	BCW-7 0-1.5	BCW-7 0-1.5	643689	4753785	4	0.37	0.27						13.9	287.77	26.6187	4.64
Bennington Local	BCW-8 0-1.5	BCW-8 0-1.5	643430	4753523	3.5								18.1	193.37	0	3.5
Bennington Local	7-21-17-1S	Honeysuckle-lane	644521	4753676	2.4	0.42			0.17							2.99
Bennington Local	7-21-17-2S	Matteson Rd	644813	4753972	2.3		0.32	0.16	0.15							2.93
Bennington Local	7-21-17-3S	Rice Lane	645245	4753113	6.7		0.23	0.13	0.16							7.22
Bennington Local	7-24-17-1S	Rt. 7a	646189	4752348	1.7			0.15								1.85
Bennington Local	7-24-17-2S	Chapel Rd.	648608	4751518	0.63		0.41									1.04
Bennington Local	052119-1 WH-1	Whip 1	642101	4750425	4.9	0.67	0.45	0.33	0.36	0.34		0.27	14.9	328.859	44.9664	7.32
Bennington Local	052119-2 WH-2	Whip 2	641844	4750452	16	0.49	0.67						28.8	555.556	17.0139	17.16
Downwind of Petersburgh	061119-1 TC-1	Taconic Crest-19-1	641352	4733208	7.4	2.9	0.85	0.59	1	0.38	0.62		112	66.0714	25.8929	13.74
Downwind of Petersburgh	061119-1 TC-2	Taconic Crest-19-2	641263	4733322	6	2.7	0.9	0.54	1		0.62		48.4	123.967	55.7851	11.76
Downwind of Petersburgh	061119-1 TC-3	Taconic Crest-19-3	641090	4733945	5.6	1.4	0.62	0.47	0.47				20.4	274.51	68.6275	8.56
Downwind of Petersburgh	061119-1 TC-4	DUP	641090	4733945	3.6	0.99	0.39	0.29	0.3				22.1	162.896	44.7964	5.57
Downwind of Petersburgh	061119-1 TC-5	Taconic Crest-19-4	640875	4734689	3.7	1.7	0.45	0.39	0.5		0.33		30.1	122.924	56.4784	7.07
Downwind of Petersburgh	061119-1 TC-6	Taconic Crest-19-5	640685	4735261	3.8	1.2	0.49	0.3	0.34				41.6	91.3462	28.8462	6.13
