# Supplementary material for: PFAS soil and groundwater contamination via industrial airborne emission and land deposition in SW Vermont and Eastern New York State, USA
Source: Royal Society of Chemistry journal article supplement (doi:10.1039/d0em00427h), 2021-01-01
Supplement: d0em00427h5.xlsx [file d0em00427h5.xlsx]

## Sheet: WaterData
Supplementary Information Table ESI-5: Results of water PFAS analyses
Supplemental data to accompany "PFAS soil and groundwater contamination via industrial airborne emission and land deposition in SW Vermont and Eastern New York State, USA"
Sample location coordinates in WGS-84 UTM Zone 18 North (EPSG: 32618)
Sample Region - Bennington Local
Address/Site-Name	Type	UTM E	UTM N	Date	PFOA (ppt)	PFOS	PFBS	PFHpA	PFHxS	PFHxA	PFNA	PFDA	PFDoA	PFTA	PFTrDA	PFUnA
Asa's Way - Residential Well #1	Bedrock_Well	643239	4753094	2016-04-09	86	<4.0	<9.0	5.3	<3.0	NA	<2.0	NA	NA	NA	NA	NA
				2016-04-23	88	<4.0	<9.0	5.2	<3.0	NA	7.6	NA	NA	NA	NA	NA
				2016-05-15	85	<4.0	<9.0	5.2	<3.0	NA	7.6	NA	NA	NA	NA	NA
				2016-07-06	81	<4.0	<9.0	5	<3.0	NA	<2.0	NA	NA	NA	NA	NA
				2016-10-08	110	<2.0	<2.0	5.7	<2.0	<2.0	<2.0	<2.0	<2.0	<2.0	<2.0	<2.0
				2016-11-05	100	<2.0	<2.0	5.1	<2.0	<2.0	<2.0	<2.0	<2.0	<2.0	<2.0	<2.0
				2017-01-22	110	<2.0	<2.0	5.4	<2.0	<2.0	<2.0	<2.0	<2.0	<2.0	<2.0	<2.0
				2017-07-30	130	<2.0	<2.0	6.5	<2.0	<2.0	<2.0	<2.0	<2.0	<2.0	<2.0	<2.0
Susan Taylor Ln - Residential Well #2	Bedrock_Well	643397	4752964	2016-04-09	2600	<4.0	<9.0	100	<3.0	NA	<2.0	NA	NA	NA	NA	NA
				2016-04-23	2500	<4.0	<9.0	99	<3.0	NA	<2.0	NA	NA	NA	NA	NA
				2016-05-15	2500	<4.0	<9.0	95	<3.0	NA	<2.0	NA	NA	NA	NA	NA
				2016-07-06	2500	<4.0	<9.0	110	<3.0	NA	<2.0	NA	NA	NA	NA	NA
				2016-10-08	3000	<2.0	<2.0	130	<2.0	38	<2.0	<2.0	<2.0	<2.0	<2.0	<2.0
				2017-01-22	2700	<2.0	<2.0	91	<2.0	26	<2.0	<2.0	<2.0	<2.0	<2.0	<2.0
				2017-07-30	3100	<2.0	<2.0	93	<2.0	29	<2.0	<2.0	<2.0	<2.0	<2.0	<2.0
Susan Taylor Ln - Residential Well #3	Bedrock_Well	643450	4752957	2016-04-09	<2.0	<4.0	<9.0	<1.0	<3.0	NA	<2.0	NA	NA	NA	NA	NA
				2016-04-23	4.8	<4.0	<9.0	<1.0	<3.0	NA	<2.0	NA	NA	NA	NA	NA
				2016-05-15	6.2	<4.0	<9.0	<1.0	<3.0	NA	<2.0	NA	NA	NA	NA	NA
				2016-05-28	2.9	<4.0	<9.0	<1.0	<3.0	NA	<2.0	NA	NA	NA	NA	NA
				2016-07-06	2.9	<4.0	<9.0	<1.0	<3.0	NA	<2.0	NA	NA	NA	NA	NA
				2016-10-08	2.6	<2.0	<2.0	<2.0	<2.0	<2.0	<2.0	<2.0	<2.0	<2.0	<2.0	<2.0
				2017-01-26	6.7	<2.0	<2.0	<2.0	<2.0	<2.0	<2.0	<2.0	<2.0	<2.0	<2.0	<2.0
				2017-07-30	4.2	<2.0	<2.0	<2.0	<2.0	<2.0	<2.0	<2.0	<2.0	<2.0	<2.0	<2.0
Bennington College, Bennington, VT - Pond	Surface_Water	643667	4753565	2016-04-09	95	<4.0	<9.0	5.6	<3.0	NA	7.6	NA	NA	NA	NA	NA
				2016-04-09	98	<4.0	<9.0	5.5	<3.0	NA	8.2	NA	NA	NA	NA	NA
				2016-05-28	130	<4.0	<9.0	7.1	<3.0	NA	15	NA	NA	NA	NA	NA
				2016-07-06	190	<4.0	<9.0	11	<3.0	NA	23	NA	NA	NA	NA	NA
				2016-07-11	180	<4.0	<9.0	11	<3.0	NA	22	NA	NA	NA	NA	NA
				2016-10-08	150	<2.0	<2.0	8.5	<2.0	23	19	<2.0	<2.0	<2.0	<2.0	<2.0
				2016-11-05	110	<2.0	<2.0	5.9	<2.0	15	14	<2.0	<2.0	<2.0	<2.0	<2.0
				2017-06-16	180	<2.0	4.2	9.7	<2.0	11	15	<2.0	<2.0	<2.0	<2.0	<2.0
				2017-12-21	170	<2.0	4.2	9.4	<2.0	21	8.4	<2.0	<2.0	<2.0	<2.0	<2.0
				2018-04-22	150	<2.0	3.5	7.7	<2.0	9.4	4.8	<2.0	<2.0	<2.0	<2.0	<2.0
				2020-03-10	96	<2.0	2.9	5.3	<2.0	4.9	2.7	<2.0	<2.0	<2.0	<2.0	<2.0
Pleasant Street Spring	Spring	643437	4754091	2016-04-09	330	<4.0	<9.0	11	<3.0	NA	<2.0	NA	NA	NA	NA	NA
				2016-04-23	370	<4.0	<9.0	12	<3.0	NA	<2.0	NA	NA	NA	NA	NA
				2016-05-28	360	<4.0	<9.0	12	<3.0	NA	<2.0	NA	NA	NA	NA	NA
				2016-07-06	320	<2.0	<4.0	11	<2.0	NA	<2.0	NA	NA	NA	NA	NA
				2016-10-08	300	<2.0	<2.0	9.7	<2.0	2.6	<2.0	<2.0	<2.0	<2.0	<2.0	<2.0
				2017-07-25	530	<2.0	3.7	16	<2.0	3.8	<2.0	<2.0	<2.0	<2.0	<2.0	<2.0
Stream Across College Drive, Bennington, VT	Surface_Water	644338	4753067	2016-05-28	330	<4.0	<9.0	14	<3.0	NA	<2.0	NA	NA	NA	NA	NA
				2017-06-16	490	<2.0	2.8	21	<2.0	7.8	<2.0	<2.0	<2.0	<2.0	<2.0	<2.0
				2017-12-21	230	<2.0	<2.0	8.6	<2.0	3.6	<2.0	<2.0	<2.0	<2.0	<2.0	<2.0
College Rd + Harlan Rd, Bennington, VT	Surface_Water	644281	4753386	2016-05-28	330	<4.0	<9.0	15	<3.0	NA	<2.0	NA	NA	NA	NA	NA
				2016-07-11	360	<4.0	<9.7	11	<3.2	NA	<2.2	NA	NA	NA	NA	NA
Mile Around Swamp, Bennington, VT (Sample taken from wetland near main trailhead)	Surface_Water	642733	4754348	2016-05-28	320	<4.0	<9.0	12	<3.0	NA	<2.0	NA	NA	NA	NA	NA
				2016-11-05	53	<2.0	<2.0	<2.0	<2.0	<2.0	<2.0	<2.0	<2.0	<2.0	<2.0	<2.0
Mile Around Woods Creek, Bennington, VT(Sample taken from creek/wetland higher into woods)	Surface_Water	642513	4754079	2016-07-06	180	<4.0	<9.0	8.7	<3.0	NA	<2.0	NA	NA	NA	NA	NA
				2016-10-24	290	<2.0	<2.0	10	<2.0	5.8	3.4	<2.0	<2.0	<2.0	<2.0	<2.0
Harrington Rd Creek, Bennington, VT	Surface_Water	641591	4754549	2016-05-15	68	<4.0	<9.0	1.9	<3.0	NA	<2.0	NA	NA	NA	NA	NA
				2016-11-05	36	<2.0	<2.0	<2.0	<2.0	<2.0	<2.0	<2.0	<2.0	<2.0	<2.0	<2.0
BCW-2	Overburden Well	643702	4753688	2017-06-16	110	<2.0	2.7	8.8	<2.0	12	2.5	<2.0	<2.0	<2.0	<2.0	<2.0
				2017-08-01	150	<2.0	2.2	9.1	<2.0	8.6	<2.0	<2.0	<2.0	<2.0	<2.0	<2.0
				2017-10-02	190	<2.0	<2.0	10	<2.0	7.3	2.5	<2.0	<2.0	<2.0	<2.0	<2.0
				2018-04-22	190	<2.0	<2.0	7.6	<2.0	3.7	<2.0	<2.0	<2.0	<2.0	<2.0	<2.0
				2019-04-01	190	<2.0	<2.0	7.3	<2.0	3.5	<2.0	<2.0	<2.0	<2.0	<2.0	<2.0
				2020-03-07	250	<2.0	<2.0	10	<2.0	3.6	<2.0	<2.0	<2.0	<2.0	<2.0	<2.0
BCW-1	Overburden Well	643704	4753753	2017-06-16	950	<2.0	<2.0	54	<2.0	12	<2.0	<2.0	<2.0	<2.0	<2.0	<2.0
				2017-08-02	1600	<2.0	<2.0	58	<2.0	15	2.1	<2.0	<2.0	<2.0	<2.0	<2.0
				2017-08-02	1600	<2.0	<2.0	58	<2.0	16	<2.0	<2.0	<2.0	<2.0	<2.0	<2.0
				2017-10-02	1400	<2.0	<2.0	59	<2.0	13	<2.0	<2.0	<2.0	<2.0	<2.0	<2.0
				2018-04-22	1400	<2.0	<2.0	48	<2.0	12	<2.0	<2.0	<2.0	<2.0	<2.0	<2.0
				2019-04-01	1000	<2.0	<2.0	34	<2.0	9.1	<2.0	<2.0	<2.0	<2.0	<2.0	<2.0
				2020-03-07	1300	<2.0	<2.0	67	<2.0	12	<2.0	<2.0	<2.0	<2.0	<2.0	<2.0
BCW-3	Overburden Well	643342	4753124	2017-06-16	690	<2.0	<2.0	25	<2.0	4.9	<2.0	<2.0	<2.0	<2.0	<2.0	<2.0
				2017-08-02	670	<2.0	<2.0	24	<2.0	6.9	<2.0	<2.0	<2.0	<2.0	<2.0	<2.0
				2017-10-03	760	<2.0	<2.0	26	<2.0	6.2	<2.0	<2.0	<2.0	<2.0	<2.0	<2.0
				2018-05-31	740	<2.0	<2.0	24	<2.0	12	<2.0	<2.0	<2.0	<2.0	<2.0	<2.0
				2019-04-02	580	<2.0	<2.0	25	<2.0	7.7	<2.0	<2.0	<2.0	<2.0	<2.0	<2.0
				2019-04-02	630	<2.0	<2.0	25	<2.0	7.1	<2.0	<2.0	<2.0	<2.0	<2.0	<2.0
BCW-5	Overburden Well	644134	4753476	2018-06-01	290	<2.0	<2.0	16	<2.0	9.4	<2.0	<2.0	<2.0	<2.0	<2.0	<2.0
				2019-04-02	190	<2.0	<2.0	12	<2.0	5.9	<2.0	<2.0	<2.0	<2.0	<2.0	<2.0
BCW-6	Overburden Well	644037	4753662	2018-06-01	120	<2.0	<2.0	4.5	<2.0	<2.0	2	<2.0	<2.0	<2.0	<2.0	<2.0
				2019-04-02	160	<2.0	<2.0	5.2	<2.0	<2.0	<2.0	<2.0	<2.0	<2.0	<2.0	<2.0
BCW-7	Overburden Well	643427	4753527	2018-05-31	3000	<2.0	2	210	<2.0	45	<2.0	<2.0	<2.0	<2.0	<2.0	<2.0
				2019-04-01	2200	<2.0	<2.0	94	<2.0	19	<2.0	<2.0	<2.0	<2.0	<2.0	<2.0
				2020-03-07	2100	<2.0	2.2	76	<2.0	29	<2.0	<2.0	<2.0	<2.0	<2.0	<2.0
BCW-8	Overburden Well	643427	4753527	2018-05-31	560	<2.0	<2.0	23	<2.0	11	3.5	<2.0	<2.0	<2.0	<2.0	<2.0
				2019-04-01	520	<2.0	<2.0	18	<2.0	9.1	3.2	<2.0	<2.0	<2.0	<2.0	<2.0
				2020-03-07	470	<2.0	<2.0	15	<2.0	4.1	<2.0	<2.0	<2.0	<2.0	<2.0	<2.0
VAPA Well	Overburden Well	644133	4753474	2018-01-31	6.3	<2.0	<2.0	<2.0	<2.0	2.4	<2.0	<2.0	<2.0	<2.0	<2.0	<2.0
				2018-01-31	5.4	<2.0	<2.0	<2.0	<2.0	2.6	<2.0	<2.0	<2.0	<2.0	<2.0	<2.0
206 Mattheson Bog	Surface_Water	644944	4753816	2017-06-16	210	11	<2.0	6.7	<2.0	3.7	<2.0	<2.0	<2.0	<2.0	<2.0	<2.0
				2018-06-01	120	3.2	<2.0	4.7	<2.0	2.8	<2.0	<2.0	<2.0	<2.0	<2.0	<2.0
206 Mattheson Seep	Seep	645067	4753948	2017-06-16	92	<2.0	<2.0	4.5	<2.0	<2.0	<2.0	<2.0	<2.0	<2.0	<2.0	<2.0
				2018-06-01	91	<2.0	<2.0	3.8	<2.0	<2.0	<2.0	<2.0	<2.0	<2.0	<2.0	<2.0
674 Rice Lane - Stream	Surface_Water	644981	4752814	2016-10-08	22	<2.0	<2.0	<2.0	<2.0	<2.0	<2.0	<2.0	<2.0	<2.0	<2.0	<2.0
East Campus, Bennington, VT - Wetland & Pond	Surface_Water	644108	4753755	2016-10-22	22	<2.0	<2.0	<2.0	<2.0	<2.0	<2.0	<2.0	<2.0	<2.0	<2.0	<2.0
No. Ben. Gas Station Well#1	Overburden_Well	643375	4754668	2016-10-22	200	<2.0	5.6	7	3	6.5	<2.0	<2.0	<2.0	<2.0	<2.0	<2.0
Paran Creek at Chemfab	Surface_Water	643157	4753032	2016-11-05	9.2	<2.0	<2.0	<2.0	<2.0	<2.0	<2.0	<2.0	<2.0	<2.0	<2.0	<2.0
West Road	Bedrock_Well	643361	4748857	2016-04-23	<2.0	<4.0	<9.0	<1.0	<3.0	NA	<2.0	NA	NA	NA	NA	NA
Cold Spring Road	Bedrock_Well	642103	4756918	2016-04-23	<2.0	<4.0	<9.0	<1.0	<3.0	NA	<2.0	NA	NA	NA	NA	NA
Rice Lane	Bedrock_Well	644950	4752833	2016-10-08	<2.0	<2.0	<2.0	<2.0	<2.0	<2.0	<2.0	<2.0	<2.0	<2.0	<2.0	<2.0
State Line Road	Bedrock_Well	640760	4756701	2016-10-22	<2.0	<2.0	<2.0	<2.0	<2.0	<2.0	<2.0	<2.0	<2.0	<2.0	<2.0	<2.0
Mile Around Woods Spring	Spring	642390	4754272	2018-01-16	180	<2.0	<2.0	8	<2.0	2.4	<2.0	<2.0	<2.0	<2.0	<2.0	<2.0
Iron Kettle Spring	Spring	646104	4757835	2018-01-16	2.8	<2.0	<2.0	<2.0	<2.0	<2.0	<2.0	<2.0	<2.0	<2.0	<2.0	<2.0
Daniel Rd Creek	Surface_Water	644850	4757123	2018-01-16	2.3	<2.0	<2.0	<2.0	<2.0	<2.0	<2.0	<2.0	<2.0	<2.0	<2.0	<2.0
Brick House Wetlands	Spring	644018	4755862	2018-01-30	3.2	<2.0	<2.0	<2.0	<2.0	<2.0	<2.0	<2.0	<2.0	<2.0	<2.0	<2.0
Watson Spring	Spring	643531	4756787	2018-01-30	4.7	<2.0	<2.0	<2.0	<2.0	<2.0	<2.0	<2.0	<2.0	<2.0	<2.0	<2.0
Coffield Spring	Spring	644658	4757854	2018-01-30	6.7	<2.0	<2.0	<2.0	<2.0	<2.0	<2.0	<2.0	<2.0	<2.0	<2.0	<2.0
Cookie Spring	Spring	644776	4759143	2018-01-30	2.7	<2.0	<2.0	<2.0	<2.0	<2.0	<2.0	<2.0	<2.0	<2.0	<2.0	<2.0
Cold Spring	Spring	642870	4757018	2018-01-30	2.7	<2.0	<2.0	<2.0	<2.0	<2.0	<2.0	<2.0	<2.0	<2.0	<2.0	<2.0
Silk Rd. Overpass - pumped	Seep	644956	4751785	2017-07-25	290	<2.0	<2.0	8.5	<2.0	3.8	<2.0	<2.0	<2.0	<2.0	<2.0	<2.0
Silk Rd. Overpass - tributary	Surface_Water	644970	4751748	2017-07-25	440	<2.0	<2.0	13	<2.0	4	<2.0	<2.0	<2.0	<2.0	<2.0	<2.0
Silk Rd. Artesian Well	Bedrock_Well	644927	4752565	2017-07-25	<2.0	<2.0	<2.0	<2.0	<2.0	<2.0	<2.0	<2.0	<2.0	<2.0	<2.0	<2.0
Paper Mill Dam Seep	Seep	644162	4752625	2017-07-25	71	<2.0	<2.0	2.9	<2.0	2.2	<2.0	<2.0	<2.0	<2.0	<2.0	<2.0
Town Park Seep	Seep	644012	4752700	2017-07-25	600	2	<2.0	20	<2.0	12	<2.0	<2.0	<2.0	<2.0	<2.0	<2.0
Henry Bridge Seep	Seep	642496	4752585	2017-07-25	1000	<2.0	2.6	28	<2.0	19	<2.0	<2.0	<2.0	<2.0	<2.0	<2.0
Ore Bed Rd. Spring	Spring	641791	4752105	2017-07-25	540	<2.0	<2.0	14	<2.0	3.5	<2.0	<2.0	<2.0	<2.0	<2.0	<2.0
Mine Shaft	Bedrock_Well	641620	4751574	2017-07-26	2.6	<2.0	<2.0	<2.0	<2.0	<2.0	<2.0	<2.0	<2.0	<2.0	<2.0	<2.0
Mile Around Woods Seep	Seep	642420	4753849	2017-07-26	730	<2.0	<2.0	28	<2.0	7.6	<2.0	<2.0	<2.0	<2.0	<2.0	<2.0
Creek under 67A	Surface_Water	645029	4752523	2017-06-16	110	<2.0	<2.0	4	<2.0	<2.0	<2.0	<2.0	<2.0	<2.0	<2.0	<2.0
Campus Wetland	Surface_Water	644108	4753755	2017-06-16	91	<2.0	<2.0	4.2	<2.0	<2.0	<2.0	<2.0	<2.0	<2.0	<2.0	<2.0
Wetland East Side	Surface_Water	645057	4754024	2017-06-16	23	<2.0	<2.0	<2.0	<2.0	<2.0	<2.0	<2.0	<2.0	<2.0	<2.0	<2.0
VAPA Wetland	Surface_Water	644081	4753667	2018-06-01	33	6.6	<2.0	2.5	<2.0	3.9	2	<2.0	<2.0	<2.0	<2.0	<2.0
Mattheson Rd. Creek	Surface_Water	644688	4753633	2018-06-01	480	2.5	5.6	28	<2.0	15	<2.0	<2.0	<2.0	<2.0	<2.0	<2.0
Fish Hatch Spring	Spring	645262	4756396	2018-06-14	<2.0	<2.0	<2.0	<2.0	<2.0	<2.0	<2.0	<2.0	<2.0	<2.0	<2.0	<2.0
Fish Hatch Spring - DUP	Spring	645262	4756396	2018-06-14	<2.0	<2.0	<2.0	<2.0	<2.0	<2.0	<2.0	<2.0	<2.0	<2.0	<2.0	<2.0
Downwind Sampling Region
Address/Site-Name	Type	UTM E	UTM N	Date	PFOA (ppt)	PFOS	PFBS	PFHpA	PFHxS	PFHxA	PFNA	PFDA	PFDoA	PFTA	PFTrDA	PFUnA
White Rocks Spring	Spring			2017-07-20	35	<2.0	<2.0	<2.0	<2.0	<2.0	<2.0	<2.0	<2.0	<2.0	<2.0	<2.0
	Spring	650945	4753351	2017-09-30	41	<2.0	<2.0	<2.0	<2.0	<2.0	<2.0	<2.0	<2.0	<2.0	<2.0	<2.0
Trail Spring	Spring	652813	4752659	2017-09-30	<2.0	<2.0	<2.0	<2.0	<2.0	<2.0	<2.0	<2.0	<2.0	<2.0	<2.0	<2.0
Highway 9 Spring	Spring	655553	4749046	2017-09-30	<2.0	<2.0	<2.0	<2.0	<2.0	<2.0	<2.0	<2.0	<2.0	<2.0	<2.0	<2.0
Bald Mtn Stream	Surface_Water	649307	4750384	2017-07-20	9.9	<2.0	<2.0	<2.0	<2.0	<2.0	<2.0	<2.0	<2.0	<2.0	<2.0	<2.0
Bear Wallow Spring	Spring	651724	4753538	2018-06-12	16	<2.0	<2.0	<2.0	<2.0	<2.0	<2.0	<2.0	<2.0	<2.0	<2.0	<2.0
Trail Spring #2	Spring	652650	4752843	2018-06-12	<2.0	<2.0	<2.0	<2.0	<2.0	<2.0	<2.0	<2.0	<2.0	<2.0	<2.0	<2.0
Maple Hill Spring	Spring	655703	4751335	2018-06-12	<2.0	<2.0	<2.0	<2.0	<2.0	<2.0	<2.0	<2.0	<2.0	<2.0	<2.0	<2.0
Melville Shelter Wetland	Surface_Water	655492	4750162	2018-06-12	2.6	<2.0	<2.0	<2.0	<2.0	<2.0	<2.0	<2.0	<2.0	<2.0	<2.0	<2.0
Aiken 1	Spring	661684	4749145	2018-06-13	<2.0	<2.0	<2.0	<2.0	<2.0	<2.0	<2.0	<2.0	<2.0	<2.0	<2.0	<2.0
Little Pond 1	Spring	658013	4751810	2018-06-13	<2.0	<2.0	<2.0	<2.0	<2.0	<2.0	<2.0	<2.0	<2.0	<2.0	<2.0	<2.0
Dunville Creek	Surface_Water	655798	4746330	2018-06-14	2.8	<2.0	<2.0	<2.0	<2.0	<2.0	<2.0	<2.0	<2.0	<2.0	<2.0	<2.0
344 Beach Rd	Bedrock_Well	657695	4750695	2019-04-03	<2.0	<2.0	<2.0	<2.0	<2.0	<2.0	<2.0	<2.0	<2.0	<2.0	<2.0	<2.0
Mitchell-Cramer	Bedrock_Well	657621	4750712	2019-04-03	<2.0	<2.0	<2.0	<2.0	<2.0	<2.0	<2.0	<2.0	<2.0	<2.0	<2.0	<2.0
BM-1A	Seep	649849	4751516	2019-04-27	33	<2.0	<2.0	<2.0	<2.0	<2.0	<2.0	<2.0	<2.0	<2.0	<2.0	<2.0
BM-1B	Seep	649899	4751590	2019-04-27	8.4	<2.0	<2.0	<2.0	<2.0	<2.0	<2.0	<2.0	<2.0	<2.0	<2.0	<2.0
BM-2A	Seep	649891	4752790	2019-04-27	100	<2.0	<2.0	3.8	<2.0	<2.0	<2.0	<2.0	<2.0	<2.0	<2.0	<2.0
BM-2B	Seep	649895	4752850	2019-04-27	6.5	<2.0	<2.0	<2.0	<2.0	<2.0	<2.0	<2.0	<2.0	<2.0	<2.0	<2.0
BM-3	Seep	650094	4753475	2019-04-27	<2.0	<2.0	<2.0	<2.0	<2.0	<2.0	<2.0	<2.0	<2.0	<2.0	<2.0	<2.0
BM-4	Seep	649997	4751985	2019-05-06	22	<2.0	<2.0	<2.0	<2.0	<2.0	<2.0	<2.0	<2.0	<2.0	<2.0	<2.0
BM-5	Seep	650164	650164	2019-05-06	35	<2.0	<2.0	2.6	<2.0	<2.0	<2.0	<2.0	<2.0	<2.0	<2.0	<2.0
BM-5 - DUP	Seep	650164	650164	2019-05-06	17	<2.0	<2.0	<2.0	<2.0	<2.0	<2.0	<2.0	<2.0	<2.0	<2.0	<2.0
HH-1	Seep	653030	4749183	2019-05-07	18	<2.0	<2.0	<2.0	<2.0	<2.0	<2.0	<2.0	<2.0	<2.0	<2.0	<2.0
HH-2	Seep	653176	4749426	2019-05-07	3.5	<2.0	<2.0	<2.0	<2.0	<2.0	<2.0	<2.0	<2.0	<2.0	<2.0	<2.0
North of Wind Pattern Sampling Region
Address/Site-Name	Type	UTM E	UTM N	Date	PFOA (ppt)	PFOS	PFBS	PFHpA	PFHxS	PFHxA	PFNA	PFDA	PFDoA	PFTA	PFTrDA	PFUnA
Bourne Pond Trail #1	Surface_Water	661502	4771359	2017-10-01	<2.0	<2.0	<2.0	<2.0	<2.0	<2.0	<2.0	<2.0	<2.0	<2.0	<2.0	<2.0
Pond 2 - Branch Pond	Surface_Water	659806	4768801	2017-10-01	<2.0	<2.0	<2.0	<2.0	<2.0	<2.0	<2.0	<2.0	<2.0	<2.0	<2.0	<2.0
Stream Grout Pond Rd	Surface_Water	661145	4768701	2017-10-01	<2.0	<2.0	<2.0	<2.0	<2.0	<2.0	<2.0	<2.0	<2.0	<2.0	<2.0	<2.0
Stream Branch Pond Rd	Surface_Water	658447	4768549	2017-10-01	<2.0	<2.0	<2.0	<2.0	<2.0	<2.0	<2.0	<2.0	<2.0	<2.0	<2.0	<2.0
Kelly 4	Spring	658346	4767378	2018-06-13	<2.0	<2.0	<2.0	<2.0	<2.0	<2.0	<2.0	<2.0	<2.0	<2.0	<2.0	<2.0
New York St. Sampling Region - Used in Overview Map Only
Address/Site-Name	Type	UTM E	UTM N	Date	PFOA (ppt)	PFOS	PFBS	PFHpA	PFHxS	PFHxA	PFNA	PFDA	PFDoA	PFTA	PFTrDA	PFUnA
Eagle Bridge/White Creek Area
Waites Hill Road, Eagles Bridge, NY (1)	Bedrock_Well	632983	4759719	2016-04-23	<2.0	<4.0	<9.0	<1.0	<3.0	NA	<2.0	NA	NA	NA	NA	NA
Waites Hill Road, Eagles Bridge, NY (2)	Spring	633073	4759706	2016-04-23	<2.0	<4.0	<9.0	<1.0	<3.0	NA	<2.0	NA	NA	NA	NA	NA
Bowdenstab Ln, Eagles Bridge, NY	Bedrock_Well	633894	47603843	2016-04-23	<2.0	<4.0	<9.0	<1.0	<3.0	NA	<2.0	NA	NA	NA	NA	NA
Brown's Knoll Ln, Eagles Bridge, NY	Bedrock_Well	631467	4759087	2016-04-23	34	23	<9.0	1.6	11	NA	<2.0	NA	NA	NA	NA	NA
		631467	4759087	2017-01-22	38	23	2.5	<2.0	11	<2.0	<2.0	<2.0	<2.0	<2.0	<2.0	<2.0
Brown's Knoll Ln, Eagles Bridge, NY	Bedrock_Well	631443	4759165	2017-01-22	16	<2.0	<2.0	<2.0	<2.0	<2.0	<2.0	<2.0	<2.0	<2.0	<2.0	<2.0
Centre Road, Eagles Bridge, NY	Bedrock_Well	631190	4757791	2016-04-23	33	<4.0	<9.0	1.6	<3.0	NA	<2.0	NA	NA	NA	NA	NA
Centre Road, Eagles Bridge, NY - Pond	Surface_Water	631223	4757726	2016-05-15	25	<4.0	<9.0	1.2	<3.0	NA	<2.0	NA	NA	NA	NA	NA
Harmony Way, Eagles Bridge, NY	Bedrock_Well	630881	4758238	2016-05-15	17	<4.0	<9.0	<1.0	<3.0	NA	<2.0	NA	NA	NA	NA	NA
Turnpike Road, White Creek, NY - Spring	Spring	631359	4759383	2016-10-08	20	<2.0	<2.0	<2.0	<2.0	<2.0	<2.0	<2.0	<2.0	<2.0	<2.0	<2.0
Turnpike Road, White Creek, NY - Well	Bedrock_Well	631265	4759336	2016-10-08	20	<2.0	<2.0	<2.0	<2.0	<2.0	<2.0	<2.0	<2.0	<2.0	<2.0	<2.0
Lincoln Hill Rd, Eagles Bridge, NY	Bedrock_Well	636387	4760012	2016-10-08	<2.0	<2.0	<2.0	<2.0	<2.0	<2.0	<2.0	<2.0	<2.0	<2.0	<2.0	<2.0
Happenchance Farm, CTH 68, Eagle Bridge, NY - Well	Bedrock_Well	634985	4758084	2016-10-08	<2.0	<2.0	<2.0	<2.0	<2.0	<2.0	<2.0	<2.0	<2.0	<2.0	<2.0	<2.0
Happenchance Farm, CTH 68, Eagle Bridge, NY - Spring	Spring	634985	4758084	2016-10-11	5.6	<2.0	<2.0	<2.0	<2.0	<2.0	<2.0	<2.0	<2.0	<2.0	<2.0	<2.0
Runoff from Landview Farm into White Creek	Surface_Water	632937	475734	2016-10-22	5.9	<2.0	<2.0	<2.0	<2.0	<2.0	<2.0	<2.0	<2.0	<2.0	<2.0	<2.0
Center White Creek at White Creek Road	Surface_Water	633946	4758889	2016-10-22	8.4	<2.0	<2.0	<2.0	<2.0	<2.0	<2.0	<2.0	<2.0	<2.0	<2.0	<2.0
Owlkill at Owlkill Road	Surface_Water	632147	4760288	2016-10-22	10	<2.0	<2.0	<2.0	<2.0	2.5	<2.0	<2.0	<2.0	<2.0	<2.0	<2.0
Owlkill at Center Road	Surface_Water	631871	4758561	2016-10-22	12	<2.0	<2.0	<2.0	<2.0	2.5	<2.0	<2.0	<2.0	<2.0	<2.0	<2.0
Pike Street, Hoosick Falls	Bedrock_Well	633665	4752301	2016-04-30	200	<4.0	<9.0	14	<3.0	NA	<2.0	NA	NA	NA	NA	NA
Residential Well #4				2016-05-15	170	<4.0	<9.0	13	<3.0	NA	<2.0	NA	NA	NA	NA	NA
				2016-07-06	170	<4.0	<9.0	12	<3.0	NA	<2.0	NA	NA	NA	NA	NA
				2016-10-08	290	<2.0	<2.0	15	<2.0	10	<2.0	<2.0	<2.0	<2.0	<2.0	<2.0
				2016-11-05	190	<2.0	<2.0	15	<2.0	10	<2.0	<2.0	<2.0	<2.0	<2.0	<2.0
				2017-01-22	260	<2.0	<2.0	14	<2.0	9.6	<2.0	<2.0	<2.0	<2.0	<2.0	<2.0
Mechanic Street, Hoosick Falls, NY	Bedrock_Well	633626	4752285	2016-04-30	850	<4.0	<9.0	22	<3.0	NA	<2.0	NA	NA	NA	NA	NA
Residential Well #5				2016-05-15	770	<4.0	<9.0	21	<3.0	NA	<2.0	NA	NA	NA	NA	NA
				2016-07-06	700	<4.0	<9.0	20	<3.0	NA	<2.0	NA	NA	NA	NA	NA
				2016-10-08	850	<2.0	<2.0	24	<2.0	12	<2.0	<2.0	<2.0	<2.0	<2.0	<2.0
				2016-11-05	740	<2.0	<2.0	23	<2.0	11	<2.0	<2.0	<2.0	<2.0	<2.0	<2.0
				2017-01-22	770	<2.0	<2.0	20	<2.0	10	<2.0	<2.0	<2.0	<2.0	<2.0	<2.0
				2017-08-01	890	<2.0	<2.0	23	<2.0	11	<2.0	<2.0	<2.0	<2.0	<2.0	<2.0
Mechanic Street Ext., Hoosick Falls, NY	Bedrock_Well	633569	4752321	2016-05-15	700	<4.0	<9.0	21	<3.0	NA	<2.0	NA	NA	NA	NA	NA
Residential Well #6				2016-10-08	940	<2.0	<2.0	26	<2.0	12	<2.0	<2.0	<2.0	<2.0	<2.0	<2.0
				2016-11-05	810	<2.0	<2.0	28	<2.0	13	<2.0	<2.0	<2.0	<2.0	<2.0	<2.0
				2017-08-01	790	<2.0	<2.0	19	<2.0	8.9	<2.0	<2.0	<2.0	<2.0	<2.0	<2.0
Mechanic Street Ext., Hand-Dug Well	Overburden_Well	633569	4752321	2016-11-05	310	3.2	2.7	8.7	<2.0	6.6	<2.0	<2.0	<2.0	<2.0	<2.0	<2.0
				2017-01-22	870	<2.0	<2.0	23	<2.0	11	<2.0	<2.0	<2.0	<2.0	<2.0	<2.0
Mechanic St., Hoosick Falls, NY	Bedrock_Well	633685	4752103	2016-10-08	5.6	<2.0	<2.0	<2.0	<2.0	<2.0	<2.0	<2.0	<2.0	<2.0	<2.0	<2.0
Residential Well #7				2016-11-05	5.6	<2.0	<2.0	<2.0	<2.0	<2.0	<2.0	<2.0	<2.0	<2.0	<2.0	<2.0
				2017-01-22	6.4	<2.0	<2.0	<2.0	<2.0	<2.0	<2.0	<2.0	<2.0	<2.0	<2.0	<2.0
				2017-08-01	6.7	<2.0	<2.0	<2.0	<2.0	<2.0	<2.0	<2.0	<2.0	<2.0	<2.0	<2.0
