# Supplementary material for: PFAS soil and groundwater contamination via industrial airborne emission and land deposition in SW Vermont and Eastern New York State, USA
Source: Royal Society of Chemistry journal article supplement (doi:10.1039/d0em00427h), 2021-01-01
Supplement: d0em00427h6.pdf [file d0em00427h6.pdf]

## Supporting Information

ESI-1. Detailed sampling and analysis procedures

ESI-2. Results of duplicate water and soil samples for QA/QC analysis

ESI-3. "Jupyter Notebook" file output that includes all python code and output plots and tables for analysis of the soil PFAS data generated by this study.

ESI-4. Results of soil PFAS analyses. Detection limits are listed for samples with concentrations below detection limits. \* denotes samples with concentration below the quantification limit, thus the listed concentration is an approximate value. All locations are in WGS84 UTM Zone 18 North.

ESI-5. Results of water PFAS analyses. Type of water source is denoted. All locations are in WGS84 UTM Zone 18 North.
